# Supplementary material for: Abiotic reduction of 3-nitro-1,2,4-triazol-5-one (NTO) and other munitions constituents by wood-derived biochar through its rechargeable electron storage capacity
Source: Royal Society of Chemistry journal article supplement (doi:10.1039/d1em00447f), 2022-01-01
Supplement: d1em00447f1.pdf [file d1em00447f1.pdf]

Electronic Supplementary Information

**Abiotic Reduction of 3-Nitro-1,2,4-triazol-5-one (NTO) and Other Munitions Constituents  
by Wood-Derived Biochar through Its Rechargeable Electron Storage Capacity**

*Danhui Xin<sup>†</sup>, Julián Girón<sup>†</sup>, Mark E. Fuller<sup>‡</sup>, and Pei C. Chiu<sup>†\*</sup>*

<sup>†</sup>Department of Civil & Environmental Engineering, University of Delaware, Newark, DE 19716,  
USA

<sup>‡</sup>Aptim Federal Services, 17 Princess Road, Lawrenceville, NJ 08648, USA

**\*Corresponding Author**

Pei C. Chiu, Department of Civil and Environmental Engineering, University of Delaware,  
Newark, DE 19716; Email: [pei@udel.edu](mailto:pei@udel.edu); <https://orcid.org/0000-0003-2319-4496>

This Electronic Supplementary Information contains **23 pages, 6 sections, 7 tables, and 10 figures.**

## Contents

### Sections:

|                                                                                                                          |     |
|--------------------------------------------------------------------------------------------------------------------------|-----|
| Section S1. Biochar characterization.....                                                                                | S5  |
| Section S2. The pK <sub>a</sub> of ATO.....                                                                              | S9  |
| Section S3. ATO sorption to SRB <sub>RED</sub> .....                                                                     | S11 |
| Section S4. Thermodynamic calculation for redox reactions involved.....                                                  | S14 |
| Section S5. NQ sorption to biochar.....                                                                                  | S18 |
| Section S6. NO <sub>2</sub> <sup>-</sup> production from the abiotic transformation of RDX by Rogue <sub>RED</sub> ..... | S22 |

### Tables:

|                                                                               |     |
|-------------------------------------------------------------------------------|-----|
| Table S1. List of chemicals used.....                                         | S3  |
| Table S2. Physical-chemical properties of biochars.....                       | S6  |
| Table S3. Summary of batch reaction conditions for MC reduction.....          | S7  |
| Table S4. Summary of batch reaction conditions for MC sorption.....           | S8  |
| Table S5. Mass balance of NTO reduction by biochar in buffered solutions..... | S12 |
| Table S6. Extraction efficiency of sorbed MCs from Rogue <sub>OX</sub> .....  | S17 |
| Table S7. Mass balance of MC reduction by biochar in ASR at pH 6.....         | S20 |

### Figures:

|                                                                                                                                  |     |
|----------------------------------------------------------------------------------------------------------------------------------|-----|
| Figure S1. Gran plot for ATO titration with NaOH.....                                                                            | S9  |
| Figure S2. Sorption of ATO to 0.80 g/L of SRB <sub>RED</sub> at pH 6, 8, and 10.....                                             | S11 |
| Figure S3. $E'_H - pH$ diagram.....                                                                                              | S15 |
| Figure S4. The amounts of NTO removed and ATO produced with the same SRB <sub>RED</sub> over three consecutive redox cycles..... | S16 |
| Figure S5. Sorption of MCs to Rogue <sub>OX</sub> over time.....                                                                 | S17 |
| Figure S6. Controls for NQ sorption.....                                                                                         | S18 |
| Figure S7. Sorption of NQ to SRB <sub>OX</sub> .....                                                                             | S18 |
| Figure S8. Aqueous concentration of NQ over time with SRB <sub>OX</sub> or SRB <sub>RED</sub> .....                              | S19 |
| Figure S9. Aqueous concentration of the daughter product over time.....                                                          | S21 |
| Figure S10. NO <sub>2</sub> <sup>-</sup> formation upon RDX addition to reactors containing Rogue.....                           | S22 |

## Electronic Supplementary Information

Table S1. List of chemicals used <sup>a</sup>

|                                    | Name                                                            | Formula                                                          | Purity                                      | Manufacturer                       |
|------------------------------------|-----------------------------------------------------------------|------------------------------------------------------------------|---------------------------------------------|------------------------------------|
| Buffer                             | 2-(N-morpholino)ethanesulfonic acid (MES)                       | C <sub>6</sub> H <sub>13</sub> NO <sub>4</sub> S                 | >98%                                        | Fisher Scientific (Pittsburgh, PA) |
|                                    | 2-amino-2-(hydroxymethyl)-1,3-propanediol<br>(Tris, base)       | C <sub>4</sub> H <sub>11</sub> NO <sub>3</sub>                   | 99.8%                                       | Sigma-Aldrich (St. Louis, MO)      |
|                                    | 3-(cyclohexylamino)-2-hydroxy-1-propanesulfonic acid (CAPSO)    | C <sub>9</sub> H <sub>19</sub> NO <sub>4</sub> S                 | >99%                                        | Acros Organics (Morris Plains, NJ) |
|                                    | 2-[4-(2-hydroxyethyl)piperazin-1-yl]ethanesulfonic acid (HEPES) | C <sub>8</sub> H <sub>17</sub> N <sub>2</sub> NaO <sub>4</sub> S | >99%                                        | Fisher Scientific                  |
| Artificial stormwater runoff (ASR) | sodium chloride                                                 | NaCl                                                             | 99%                                         | Fisher Scientific                  |
|                                    | potassium chloride                                              | KCl                                                              | 99+%                                        | Acros Organics                     |
|                                    | magnesium chloride hexahydrate                                  | MgCl <sub>2</sub> ·6H <sub>2</sub> O                             | 99%                                         | Fisher Scientific                  |
|                                    | calcium chloride dihydrate                                      | CaCl <sub>2</sub> ·2H <sub>2</sub> O                             | 98+%                                        | Fisher Scientific                  |
|                                    | sodium sulfate anhydrous                                        | Na <sub>2</sub> SO <sub>4</sub>                                  | 99.8%                                       | Fisher Scientific                  |
|                                    | ammonium sulfate                                                | (NH <sub>4</sub> ) <sub>2</sub> SO <sub>4</sub>                  | 99%                                         | Fisher Scientific                  |
|                                    | calcium nitrate tetrahydrate                                    | Ca(NO <sub>3</sub> ) <sub>2</sub> ·4H <sub>2</sub> O             | >99%                                        | Fisher Scientific                  |
| pH control                         | hydrochloric acid solution                                      | HCl                                                              | 37.2% (ACS plus)                            | Fisher Scientific                  |
|                                    | sodium hydroxide solution                                       | NaOH                                                             | 1N standard solution<br>(trace metal grade) | Acros Organics                     |

## Electronic Supplementary Information

|                  |                               |               |        |                                 |
|------------------|-------------------------------|---------------|--------|---------------------------------|
| Eluents for HPLC | acetonitrile                  | $C_2H_3N$     | >99.9% | Fisher Scientific               |
|                  | trifluoroacetic acid          | $C_2HF_3O_2$  | >99.9% | MilliporeSigma (Burlington, MA) |
|                  | methanol                      | $CH_3OH$      | >99.9% | Fisher Scientific               |
|                  | potassium phosphate dibasic   | $K_2HPO_4$    | 99.4%  | Fisher Scientific               |
|                  | potassium phosphate monobasic | $KH_2PO_4$    | 99.5%  | J.T. Baker (Phillipsburg, NJ)   |
| Redox titrants   | sodium dithionite             | $Na_2S_2O_4$  | >85%   | Alfa Aesar (Haverhill, MA)      |
|                  | potassium ferricyanide        | $K_3Fe(CN)_6$ | >99%   | Acros Organics                  |

<sup>a</sup> Information on MCs is provided in the main text.

## Section S1. Biochar characterization

The properties of the biochar we measured include elemental composition (CHNS), ash content, pH, BET surface area, cation exchange capacity (CEC), and ESC. Prior to characterization, each biochar was sieved to obtain a size fraction of 250–500  $\mu\text{m}$ , washed with deionized water thoroughly, dried at 65  $^{\circ}\text{C}$  for 24 h, and stored in a desiccator.

Carbon, hydrogen, nitrogen, sulfur contents were determined using a vario MACRO cube (Elementar, Langensfeld, Germany). Fully dried samples (5–20 mg) were combusted at *ca.* 960  $^{\circ}\text{C}$  in ultra-high-purity oxygen, and passed through copper oxide pellets and then electrolytic copper with helium as carrier gas. The gases were quantified by a thermal conductivity detector (TCD). The oxygen content was estimated by subtracting carbon, hydrogen, nitrogen, sulfur, and ash contents from 100%. Ash contents were measured by combusting a biochar sample (5–10 mg) in air at 900  $^{\circ}\text{C}$  for 5 min using a Discovery thermogravimetric analyzer (TA Instruments, New Castle, DE). Ash contents were taken to be the mass remaining after combustion.

For pH measurement, 0.5 g of biochar was placed in 10 mL of deionized water (1:20 w/v) and equilibrated for 24 h. Solution pH was measured using an Oakton 11 series pH/mV/ $^{\circ}\text{C}$  meter and an Oakton pH electrode (Vernon Hills, IL), calibrated against pH 4, 7, and 10 standards. The specific surface area was measured using a Micromeritics BET surface area analyzer (Norcross, GA) through  $\text{N}_2$  adsorption to a biochar sample of known mass at 77.382 K. CEC was measured by  $\text{NH}_4^+$  replacement using EPA Method 9080.  $\text{NH}_4^+$  concentration was determined using a Metrohm 850 Professional IC AnCat unit equipped with a conductivity detector (Herisau, Switzerland). ESC was measured in our previous study through chemical redox titration<sup>1,2</sup> using dissolved oxygen (DO, +0.80 V vs. SHE at pH 7,  $P_{\text{O}_2} = 0.21$  atm) and titanium(III) citrate (–0.36 V vs. SHE at pH 6.4) as oxidant and reductant, respectively. A portion of the electrons stored in dithionite-reduced biochar was retrieved using 10 mM ferricyanide in 20 mM phosphate buffer according to the method we previously published.<sup>2</sup>

Table S2. Physical-chemical properties of biochars

|                            |   | Soil Reef biochar (SRB)          | Rogue biochar (Rogue)        |
|----------------------------|---|----------------------------------|------------------------------|
| Vendor                     |   | The Biochar Company <sup>a</sup> | Oregon Biochar Solutions     |
| Source material            |   | Southern Yellow Pine             | Douglas Fir + Ponderosa Pine |
| Pyrolysis temperature (°C) |   | 550 (slow pyrolysis)             | 900 (fast pyrolysis)         |
| Elemental                  | C | 72.01±5.00                       | 68.47±10.00                  |
| composition (%)            | H | 1.96±0.02                        | 1.50±0.20                    |
|                            | N | 0.36±0.08                        | 0.28±0.07                    |
|                            | S | 0.26±0.03                        | 0.24±0.15                    |
|                            | O | 20.82±5.00                       | 16.99±10.00                  |
| Ash (%)                    |   | 4.59±1.30                        | 12.52±0.50                   |
| pH                         |   | 7.53±0.05                        | 8.88±0.08                    |
| BET (m <sup>2</sup> /g)    |   | 158±3                            | 407±9                        |
| CEC <sup>a</sup> (mmol/g)  |   | 0.42±0.02                        | 0.12±0.03                    |
| ESC (mmol/g) measured with |   | 3.54±0.13                        | 7.07±0.15                    |
| Ti(III) citrate and DO     |   | (2.43±0.00) <sup>b</sup>         | (6.78±0.20) <sup>b</sup>     |

Errors represent the range of results from duplicates.

<sup>a</sup> CEC measured using EPA Method 9080.

<sup>b</sup> Regenerable ESC, measured over two additional redox cycles.

Table S3. Summary of batch reaction conditions for MC reduction

|                 | MC                           | C <sub>aq0</sub> | Biochar                                    | Dose     | pH                        | Background solution | Replicates | Figure     |
|-----------------|------------------------------|------------------|--------------------------------------------|----------|---------------------------|---------------------|------------|------------|
| Buffered system | NTO                          | 110 $\mu$ M      | SRB <sub>OX</sub> , SRB <sub>RED</sub>     | 0.80 g/L | 6                         | 50mM MES            | 3          | 1(a)       |
|                 | NTO                          | 110 $\mu$ M      | SRB <sub>OX</sub> , SRB <sub>RED</sub>     | 0.80 g/L | 8                         | 50mM Tris           | 3          | 1(b)       |
|                 | NTO                          | 110 $\mu$ M      | SRB <sub>OX</sub> , SRB <sub>RED</sub>     | 0.80 g/L | 10                        | 50mM CAPSO          | 3          | 1(c), 2(a) |
|                 | NTO                          | 110 $\mu$ M      | SRB <sub>OX</sub> , SRB <sub>RED</sub>     | 0.40 g/L | 10                        | 50mM CAPSO          | 3          | 2(b)       |
|                 | ATO                          | 120 $\mu$ M      | SRB <sub>RED</sub>                         | 0.80 g/L | 6, 8, and 10 <sup>a</sup> |                     | 2          | S2         |
|                 | NQ                           | 100 $\mu$ M      | SRB <sub>RED</sub>                         | 1.33 g/L | 6 and 8 <sup>a</sup>      |                     | 2          | S6(b)      |
|                 | NQ                           | 100 $\mu$ M      | SRB <sub>OX</sub> , SRB <sub>RED</sub>     | 1.33 g/L | 8                         | 50mM Tris           | 2          | S8         |
| ASR             | NTO                          | 110 $\mu$ M      | SRB <sub>OX</sub> , SRB <sub>RED</sub>     | 0.80 g/L | 6                         | ASR                 | 3          | 6(a), (b)  |
|                 | NTO                          | 110 $\mu$ M      | Rogue <sub>OX</sub> , Rogue <sub>RED</sub> | 0.80 g/L | 6                         | ASR                 | 3          | 6(a), (b)  |
|                 | DNAN                         | 400 $\mu$ M      | Rogue <sub>OX</sub> , Rogue <sub>RED</sub> | 0.44 g/L | 6                         | ASR                 | 2          | 6(c), (d)  |
|                 | RDX                          | 200 $\mu$ M      | Rogue <sub>OX</sub> , Rogue <sub>RED</sub> | 0.44 g/L | 6                         | ASR                 | 2          | 6(e), (f)  |
|                 | 2ANAN                        | 350 $\mu$ M      | Rogue <sub>OX</sub> , Rogue <sub>RED</sub> | 0.44 g/L | 6                         | ASR                 | 2          | S9(a)      |
|                 | NO <sub>2</sub> <sup>-</sup> | 200 $\mu$ M      | Rogue <sub>OX</sub> , Rogue <sub>RED</sub> | 0.44 g/L | 6                         | ASR                 | 2          | S9(b)      |

All experiments were run in an anaerobic glove box.

<sup>a</sup> 50 mM MES, Tris, and CAPSO buffers were used, respectively, to control the pH at 6, 8, and 10.

Electronic Supplementary Information

Table S4. Summary of batch reaction conditions for MC sorption

| MC   | $C_{aq0}$      | Biochar             | Dose     | pH | Background solution | Replicates | Figure      |
|------|----------------|---------------------|----------|----|---------------------|------------|-------------|
| NTO  | 5-125 $\mu$ M  | Rogue <sub>OX</sub> | 0.20 g/L | 6  | ASR                 | 2          | 5(a), S5(a) |
| NQ   | 20-250 $\mu$ M | Rogue <sub>OX</sub> | 0.44 g/L | 6  | ASR                 | 2          | 5(b), S5(b) |
| DNAN | 30-300 $\mu$ M | Rogue <sub>OX</sub> | 0.33 g/L | 6  | ASR                 | 2          | 5(c), S5(c) |
| RDX  | 10-125 $\mu$ M | Rogue <sub>OX</sub> | 0.88 g/L | 6  | ASR                 | 2          | 5(d), S5(d) |
| NQ   | 200 $\mu$ M    | SRB <sub>OX</sub>   | 0.80 g/L | 8  | 50mM Tris           | 2          | S6(a)       |
| NQ   | 25-200 $\mu$ M | SRB <sub>OX</sub>   | 0.80 g/L | 8  | 50mM Tris           | 2          | S7(a), (b)  |

All experiments were run outside of an anaerobic glove box.



Section S2. The  $pK_a$  of ATO

Since an experimentally measured  $pK_a$  was not available for ATO in the literature, we performed a titration using NaOH to determine the  $pK_a$  of ATO. As 10 mM NaOH solution was added drop by drop to 25 mL of 10 mM ATO in 100 mM KCl, the volume of NaOH added and the pH were recorded. For the titration of ATO (a weak acid) with NaOH (a strong base), we applied the Gran method to obtain the  $pK_a$  of ATO. Based on the Gran plot shown in Figure S1, the  $K_a$  of ATO =  $1.95 \times 10^{-9} \pm 6 \times 10^{-11}$ , obtained through linear regression of data before the equivalence point. This corresponds to a  $pK_a$  of **8.71 ± 0.02**.

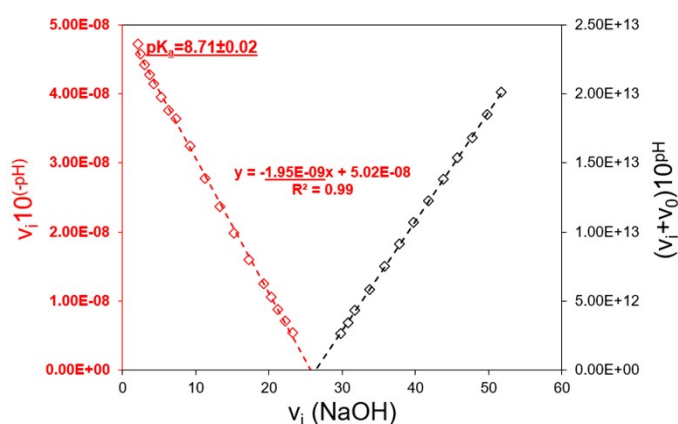

Figure S1. Gran plot for ATO titration with NaOH. The X axis is the total volume of NaOH ( $v_i$ ) added to the ATO solution up to the  $i$ th point. The left and right Y axes are calculated values of  $v_i 10^{-pH}$  and  $(v_i + v_0) 10^{pH}$ , respectively, where  $v_0$  is the initial ATO solution volume. Titration data before and after the equivalence point are plotted in red diamonds on the left Y axis and in black diamonds on the right Y axis, respectively.

Below is a description of the Gran method<sup>3</sup>:

At any point:

$$K_a = \frac{[H^+]_i [ATO^-]_i}{[HATO]_i} \quad [\text{Eq. S1}]$$

where HATO and  $ATO^-$  represent the protonated and deprotonated forms of ATO, respectively.

Before the equivalence point, approximations below can be made:

$$[HATO]_i \approx \frac{v_0 [HATO]_0 - v_i [OH^-]_0}{v_0 + v_i} \quad [\text{Eq. S2}]$$

$$[ATO^-]_i \approx \frac{v_i[OH^-]_0}{v_0 + v_i} \quad [\text{Eq. S3}]$$

where  $v_0$  and  $v_i$  are the initial ATO solution volume (25 mL) and total volume of added NaOH up to the  $i$ th point, respectively;  $[HATO]_0$  is the initial ATO concentration (10 mM), and  $[OH^-]_0$  is the concentration of the titrant (10 mM).

Substituting Eq. S2 and Eq. S3 for  $[HATO]_i$  and  $[ATO^-]_i$  in Eq. S1, respectively, yields:

$$K_a \approx \frac{[H^+]_i v_i [OH^-]_0}{v_0 [HATO]_0 - v_i [OH^-]_0} \quad [\text{Eq. S4}]$$

and

$$[H^+]_i v_i = 10^{-pH_i} v_i \approx -K_a (v_i - v_0) \frac{[HATO]_0}{[OH^-]_0} \quad [\text{Eq. S5}]$$

Therefore, before the equivalence point, if  $10^{-pH_i} v_i$  is plotted against  $v_i$ , the slope is  $-K_a$

and the equivalence point (X intercept) is  $v_0 \frac{[HATO]_0}{[OH^-]_0}$ .

At any point:

$$[OH^-]_i \approx \frac{v_i [OH^-]_0 - v_0 [HATO]_0}{v_0 + v_i} \quad [\text{Eq. S6}]$$

and

$$\frac{[OH^-]_i (v_0 + v_i)}{K_w} = 10^{pH_i} (v_0 + v_i) \approx \frac{[OH^-]_0}{K_w} \left( v_i - v_0 \frac{[HATO]_0}{[OH^-]_0} \right) \quad [\text{Eq. S7}]$$

After the equivalence point, when  $10^{pH_i} (v_0 + v_i)$  is plotted against  $v_i$ , the equivalence point is  $v_0 \frac{[HATO]_0}{[OH^-]_0}$ , meaning the two curves would have the same X intercept.

Section S3. ATO sorption to SRB<sub>RED</sub>

0.80 g/L of SRB<sub>RED</sub> was added to reactors containing ATO to determine the sorption of ATO to SRB<sub>RED</sub> at different pH. As shown in Figure S2, the amount of ATO sorbed to SRB<sub>RED</sub> at the end of the experiment was  $12 \pm 5$  and  $17 \pm 2$   $\mu\text{mol/g}$  at pH 6 and 8, respectively. In contrast, the sorption of ATO to SRB<sub>RED</sub> was negligible at pH 10.

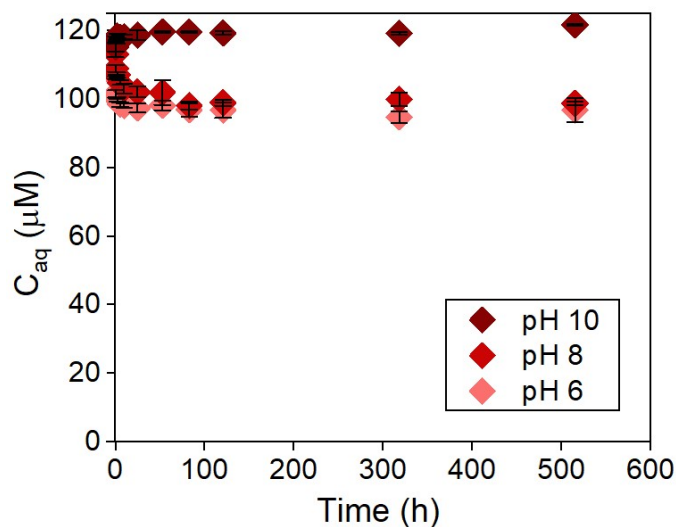

Figure S2. Sorption of ATO to 0.80 g/L of SRB<sub>RED</sub> at pH 6, 8, and 10.

Table S5. Mass balance of NTO reduction by biochar in buffered solutions

| Figure 1(a): pH 6 in 50 mM MES buffer                         |                   |       |                    |       |
|---------------------------------------------------------------|-------------------|-------|--------------------|-------|
| Biochar                                                       | SRB <sub>OX</sub> |       | SRB <sub>RED</sub> |       |
| Dose                                                          | 0.80 g/L          |       | 0.80 g/L           |       |
| ( $\mu\text{mol/g}$ )                                         | average           | stdev | average            | stdev |
| NTO <sub>total</sub>                                          | 138               | 0     | 138                | 0     |
| NTO <sub>aq</sub>                                             | 114               | 2     | 26                 | 8     |
| ATO <sub>aq</sub>                                             | –                 | –     | 86                 | 5     |
| NTO <sub>s</sub>                                              | 16                | 2     | 0                  | 0     |
| ATO <sub>s</sub>                                              | –                 | –     | 14                 | 2     |
| Mass balance (%)                                              | 94 $\pm$ 3%       |       | 91 $\pm$ 10%       |       |
| NTO <sub>total</sub> –NTO <sub>aq</sub> ( $\mu\text{mol/g}$ ) | 24 $\pm$ 0        |       | 112 $\pm$ 8        |       |
| ATO <sub>total</sub> ( $\mu\text{mol/g}$ )                    | –                 |       | 100 $\pm$ 7        |       |

| Figure 1(b): pH 8 in 50 mM Tris buffer                        |                   |       |                    |       |
|---------------------------------------------------------------|-------------------|-------|--------------------|-------|
| Biochar                                                       | SRB <sub>OX</sub> |       | SRB <sub>RED</sub> |       |
| Dose                                                          | 0.80 g/L          |       | 0.80 g/L           |       |
| ( $\mu\text{mol/g}$ )                                         | average           | stdev | average            | stdev |
| NTO <sub>total</sub>                                          | 134               | 0     | 134                | 0     |
| NTO <sub>aq</sub>                                             | 124               | 0     | 40                 | 7     |
| ATO <sub>aq</sub>                                             | –                 | –     | 68                 | 6     |
| NTO <sub>s</sub>                                              | 11                | 0     | 0                  | 0     |
| ATO <sub>s</sub>                                              | –                 | –     | 14                 | 2     |
| Mass balance (%)                                              | 101 $\pm$ 0%      |       | 91 $\pm$ 12%       |       |
| NTO <sub>total</sub> –NTO <sub>aq</sub> ( $\mu\text{mol/g}$ ) | 10 $\pm$ 0        |       | 94 $\pm$ 7         |       |
| ATO <sub>total</sub> ( $\mu\text{mol/g}$ )                    | –                 |       | 82 $\pm$ 8         |       |

| Figures 1(c) and 2(a and b): pH 10 in 50 mM CAPSO buffer |                   |       |          |       |                    |       |          |       |
|----------------------------------------------------------|-------------------|-------|----------|-------|--------------------|-------|----------|-------|
| Biochar                                                  | SRB <sub>OX</sub> |       |          |       | SRB <sub>RED</sub> |       |          |       |
| Dose                                                     | 0.80 g/L          |       | 0.40 g/L |       | 0.80 g/L           |       | 0.40 g/L |       |
| ( $\mu\text{mol/g}$ )                                    | average           | stdev | average  | stdev | average            | stdev | average  | stdev |
| NTO <sub>total</sub>                                     | 129               | 0     | 258      | 1     | 129                | 0     | 258      | 1     |
| NTO <sub>aq</sub>                                        | 127               | 0     | 255      | 1     | 45                 | 8     | 172      | 12    |

Electronic Supplementary Information

|                                                  |       |   |       |   |        |   |         |    |
|--------------------------------------------------|-------|---|-------|---|--------|---|---------|----|
| ATO <sub>aq</sub>                                | –     | – | –     | – | 84     | 4 | 86      | 12 |
| NTO <sub>s</sub>                                 | –     | – | –     | – | –      | – | –       | –  |
| ATO <sub>s</sub>                                 | –     | – | –     | – | –      | – | –       | –  |
| Mass balance (%)                                 | 98±0% |   | 99±0% |   | 100±9% |   | 101±10% |    |
| NTO <sub>total</sub> –NTO <sub>aq</sub> (μmol/g) | 2±0   |   | 3±0   |   | 84±8   |   | 86±13   |    |
| ATO <sub>total</sub> (μmol/g)                    |       |   |       |   | 84±4   |   | 86±12   |    |

Section S4. Thermodynamic calculation for the redox reaction between a model hydroquinone (AH<sub>2</sub>QDS) and ferricyanide

To elucidate the pH dependency of the redox reaction between SRB<sub>RED</sub> and ferricyanide, we use 9,10-anthrahydroquinone-2,6-disulfonate (AH<sub>2</sub>QDS) as a hypothetical hydroquinone in SRB<sub>RED</sub> to calculate how the thermodynamic driving force for the redox reaction can vary with pH.

Since no H<sup>+</sup> is involved, reduction of ferricyanide is pH-independent and can be described by the following half-reaction (Eq. S8):

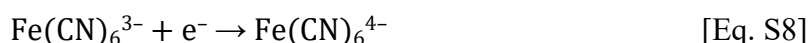

Because the first pK<sub>a</sub> of AH<sub>2</sub>QDS is 7.6<sup>4</sup>, reduction of AQDS, the oxidized counterpart of AH<sub>2</sub>QDS, can be described by the following half-reactions (Eqs. S9a, b).

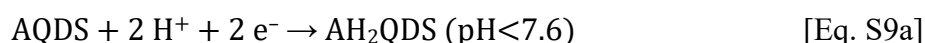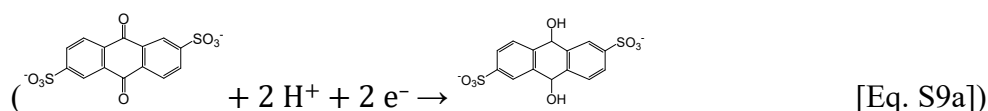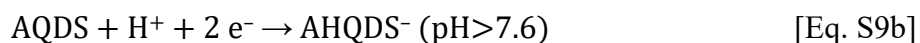

where AH<sub>2</sub>QDS and AHQDS<sup>-</sup> represent the fully protonated and singly deprotonated forms of AH<sub>2</sub>QDS.

Midpoint reduction potential ( $E_H'$ )<sup>5</sup> represents the reduction potential of a half-reaction at which the total concentration of all the oxidized species is equal to that of all the reduced species, as shown in Eqs. S10 and S11.

$$[\text{Fe(CN)}_6^{3-}] = [\text{Fe(CN)}_6^{4-}] \quad [\text{Eq. S10}]$$

$$[\text{AQDS}] = [\text{AH}_2\text{QDS}] + [\text{AHQDS}^-] \quad [\text{Eq. S11}]$$

At any given pH, the midpoint reduction potential of the half-reaction Eq. S8 can be obtained from the Nernst equation and Eq. S10:

$$E_{H(\text{Fe(CN)}_6^{3-}/\text{Fe(CN)}_6^{4-})}' = E_{H(\text{Fe(CN)}_6^{3-}/\text{Fe(CN)}_6^{4-})}^0 \quad [\text{Eq. S12}]$$

where the standard reduction potential  $E_{H(\text{Fe(CN)}_6^{3-}/\text{Fe(CN)}_6^{4-})}^0$  is +0.43 V<sup>6</sup>.

Likewise, the midpoint reduction potential of the half-reaction Eq. S9 can be obtained from the Nernst equation and Eq. S11:

$$E_{H(\text{AQDS}/\text{AH}_2\text{QDS})}' = E_{H(\text{AQDS}/\text{AH}_2\text{QDS})}^0 + 2.303 \frac{RT}{2F} \log([H^+]^2 + K_{a, \text{AH}_2\text{QDS}}[H^+]) \quad [\text{Eq. S13}]$$

where  $E_{H(AQDS/AH_2QDS)}^0$  is +0.23 V<sup>4</sup> at pH 0 and  $K_{a,AH_2QDS}$  is 7.6<sup>4</sup>.

Therefore, the  $\Delta E_H^0$  of the redox reaction between ferricyanide and AH<sub>2</sub>QDS can be calculated by Eq. S14:

$$\Delta E_{H(Fe(CN)_6^{3-}/AH_2QDS)} = E_{H(Fe(CN)_6^{3-}/Fe(CN)_6^{4-})} - E_{H(AQDS/AH_2QDS)} \quad [\text{Eq. S14}]$$

As illustrated in Figure S3, the driving force ( $\Delta E_H'$ ) for the reduction of hydroquinone (and presumably reduced biochar) by ferricyanide *increases with pH* as hydroquinone deprotonates (see the star-shaped data points in Figure 3).

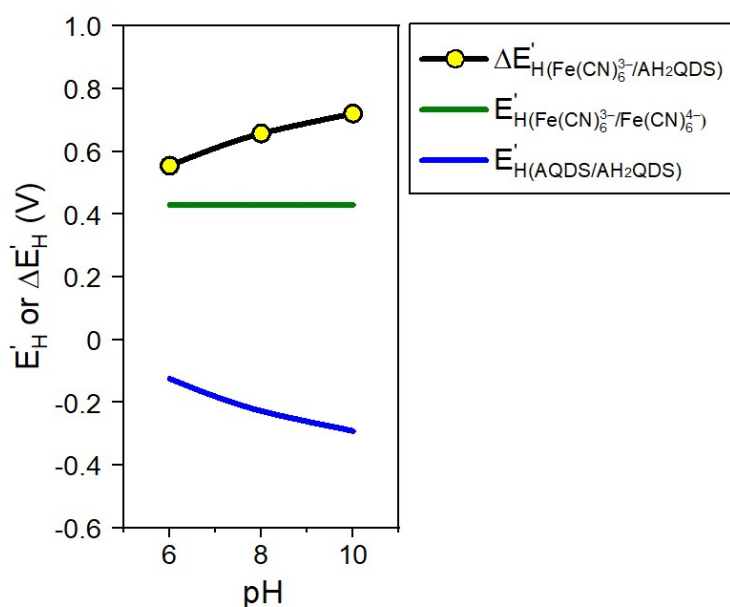

Figure S3.  $E_H' - pH$  diagram.  $E_{H(Fe(CN)_6^{3-}/Fe(CN)_6^{4-})}$ ,  $E_{H(AQDS/AH_2QDS)}$ , and  $\Delta E_{H(Fe(CN)_6^{3-}/AH_2QDS)}$  were calculated based on Eqs. S12, S13, and S14, respectively.

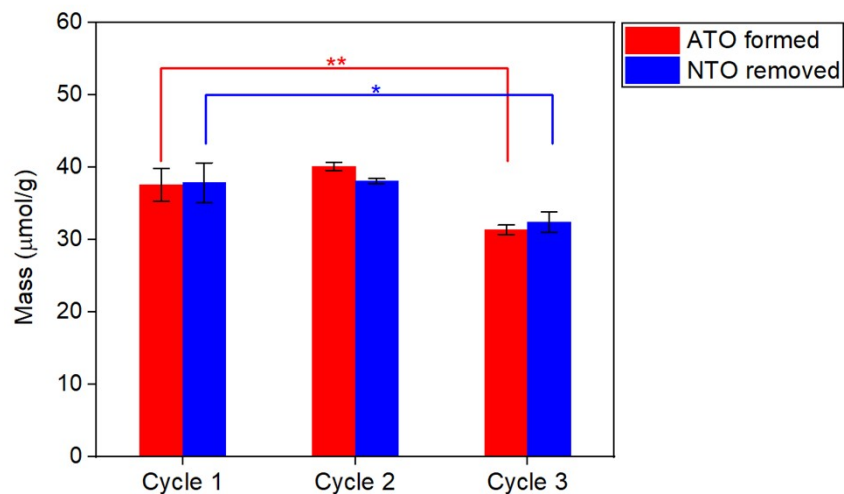

Figure S4. The amounts of NTO removed and ATO produced with the same 0.80 g/L of  $\text{SRB}_{\text{RED}}$  ("ESC-recharged") at pH 10 over three consecutive redox cycles.  $\text{SRB}_{\text{RED}}$  was regenerated with dithionite between two consecutive cycles. Single (\*) and double (\*\*) asterisks denote differences between cycle 1 and cycles 2 and 3 using a student's t-test on a significance level of 0.05 and 0.01 (i.e.,  $p < 0.05$  and  $p < 0.01$ ), respectively.



Electronic Supplementary Information

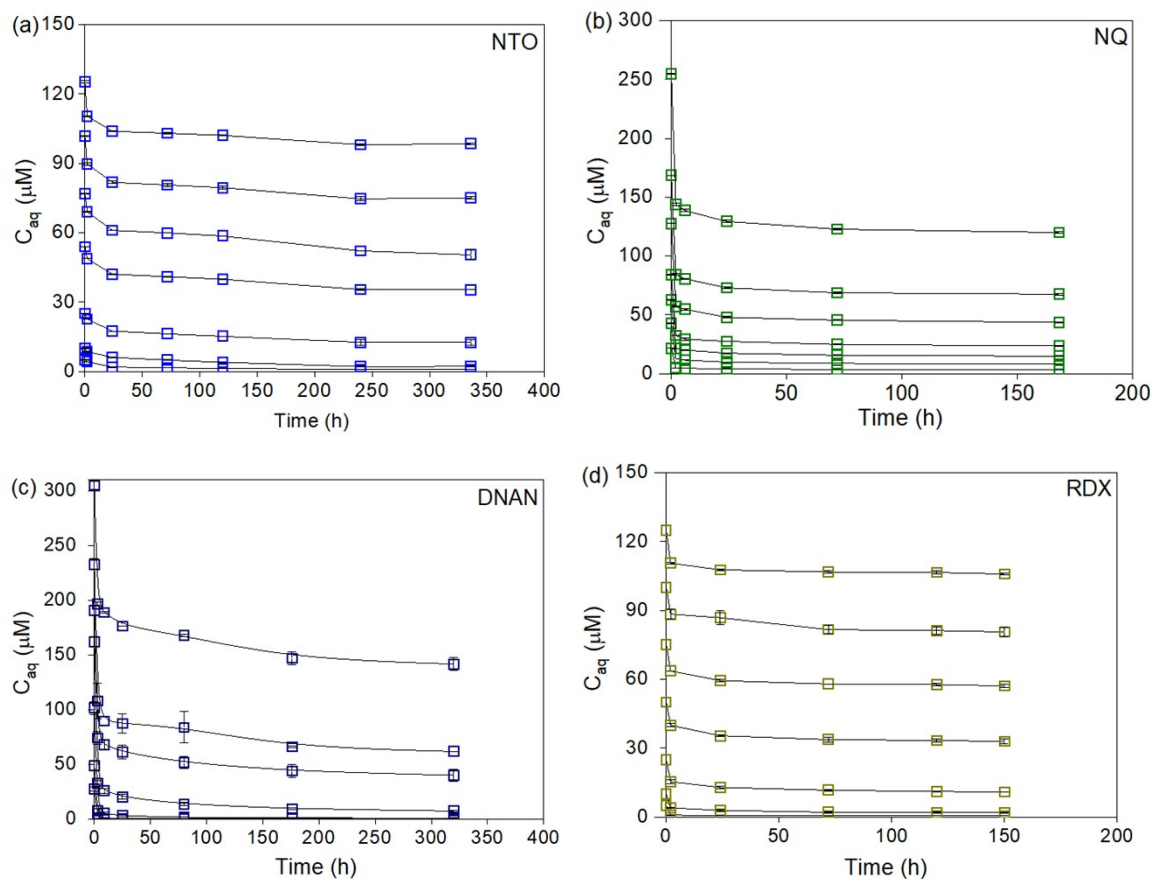

Figure S5. Sorption of MCs to Rogue<sub>ox</sub> over time. Experiments were performed in ASR at pH 6 with different initial MC concentrations. (a) NTO to 0.20 g/L Rogue<sub>ox</sub> (b) NQ to 0.44 g/L Rogue<sub>ox</sub> (c) DNAN to 0.33 g/L Rogue<sub>ox</sub> (d) RDX to 0.88 g/L Rogue<sub>ox</sub>

Table S6. Extraction efficiency of sorbed MCs from Rogue<sub>ox</sub>. Rogue<sub>ox</sub> samples that sorbed the maximum amount of each MC in Figure S5 were subjected to solvent extractions to obtain these extraction efficiencies.

|      | Removal ( $\mu\text{mol/g}$ ) |       | Recovery ( $\mu\text{mol/g}$ ) |       | Extraction efficiency (%) |
|------|-------------------------------|-------|--------------------------------|-------|---------------------------|
|      | average                       | stdev | average                        | stdev |                           |
| NTO  | 133                           | 4     | 110                            | 2     | 83±1%                     |
| NQ   | 374                           | 0     | 329                            | 32    | 88±8%                     |
| DNAN | 477                           | 8     | 421                            | 17    | 88±4%                     |
| RDX  | 214                           | 3     | 180                            | 12    | 84±6%                     |

## Section S5. NQ sorption to biochar

Parallel sorption experiments for NQ were first conducted inside and outside of the glovebox. The results in Figure S6(a) confirmed that the sorption of NQ is not influenced by the atmosphere. Thus, all other sorption experiments were conducted outside of an anaerobic glovebox. As NQ is a neutral compound under circumneutral pH conditions, a similar amount of NQ was removed at pH 6 and 8 (Figure S6(b)). We chose pH 8 to further assess the sorption of NQ to SRB for obtaining its Langmuir isotherm (Figure S7).

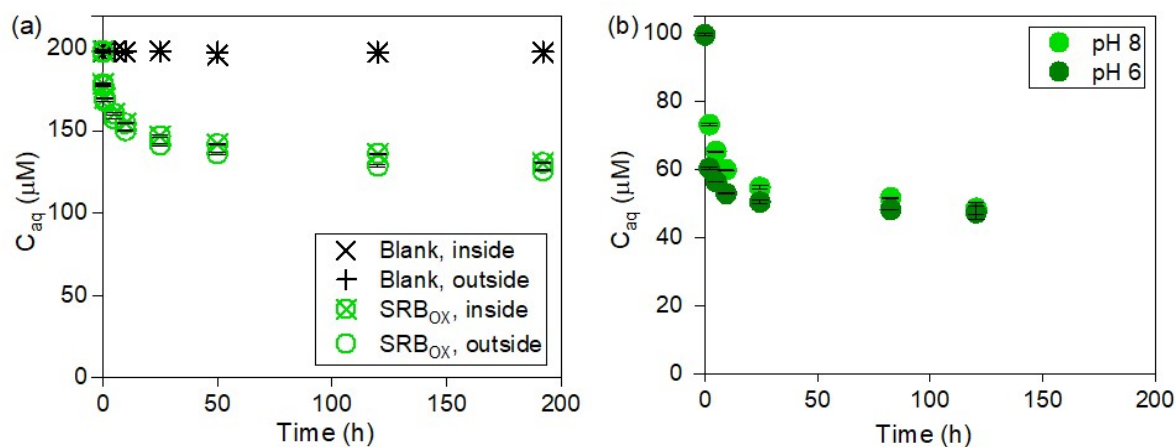

Figure S6. (a) Sorption of NQ to 0.80 g/L of  $\text{SRB}_{\text{OX}}$  inside vs. outside of the glovebox in 50 mM Tris buffer at pH 8. (b) Sorption of NQ to 1.33 g/L of  $\text{SRB}_{\text{RED}}$  at pH 6 (50 mM MES buffer) vs. pH 8 (50 mM Tris buffer) in the glovebox.

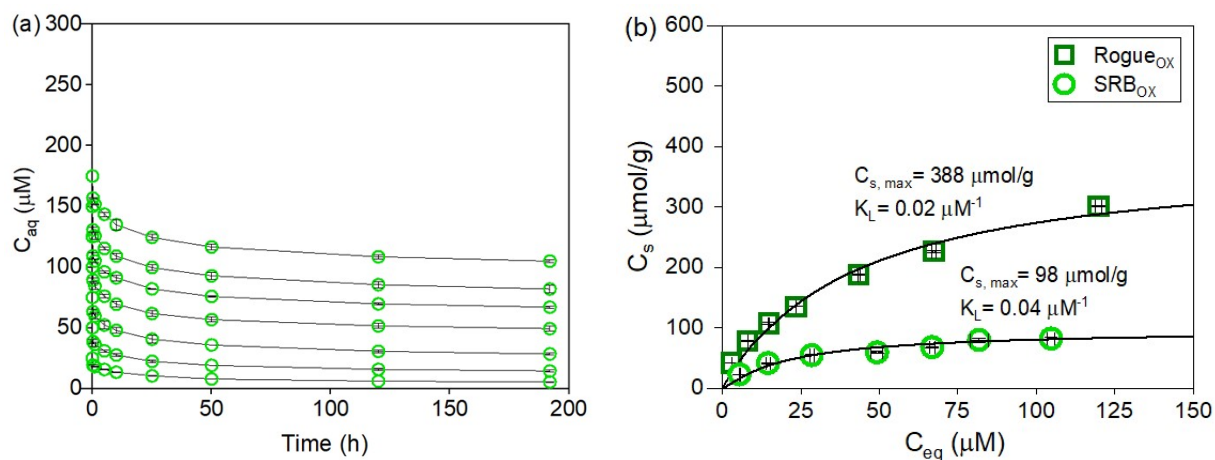

Figure S7. (a) Sorption of NQ to 0.80 g/L of  $\text{SRB}_{\text{OX}}$  at pH 8. (b) Comparison of NQ sorption to 0.80 g/L  $\text{SRB}_{\text{OX}}$  in 50 mM Tris buffer at pH 8 and to 0.44 g/L of  $\text{Rogue}_{\text{OX}}$  in ASR at pH 6, and

their fitted Langmuir isotherms. The regression  $R^2$  of the measured and predicted sorption capacities of  $\text{SRB}_{\text{OX}}$  and of  $\text{Rogue}_{\text{OX}}$  for NQ based on the fitted Langmuir isotherms were 0.98 and 0.96, respectively.

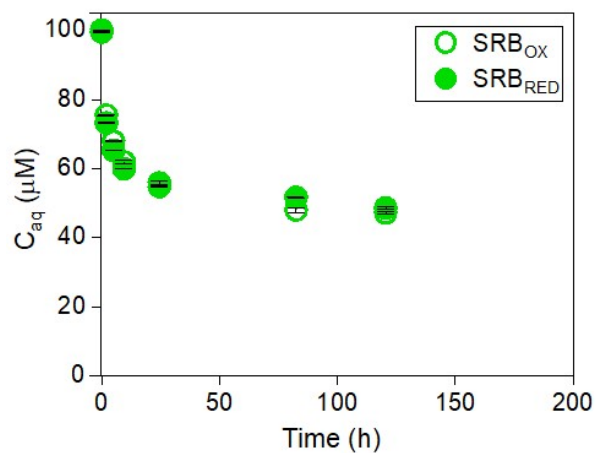

Figure S8. Aqueous concentration ( $C_{\text{aq}}$ ) of NQ over time with 1.33 g/L of  $\text{SRB}_{\text{OX}}$  or  $\text{SRB}_{\text{RED}}$  at pH 8.

Table S7. Mass balance of MC reduction by biochar in ASR at pH 6

|                            |                                                               | SRB <sub>OX</sub>     |                     | SRB <sub>RED</sub>   |                      |       |
|----------------------------|---------------------------------------------------------------|-----------------------|---------------------|----------------------|----------------------|-------|
|                            |                                                               | average               | stdev               | average              | stdev                |       |
| Figures 6(a) and (b): NTO  | ( $\mu\text{mol/g}$ )                                         |                       |                     |                      |                      |       |
|                            | NTO <sub>total</sub>                                          | 135                   | 2                   | 135                  | 2                    |       |
|                            | NTO <sub>aq</sub>                                             | 120                   | 1                   | 32                   | 7                    |       |
|                            | ATO <sub>aq</sub>                                             | –                     | –                   | 77                   | 5                    |       |
|                            | NTO <sub>s</sub>                                              | 16                    | 0                   | 1                    | 1                    |       |
|                            | ATO <sub>s</sub>                                              | –                     | –                   | 14                   | 5                    |       |
|                            | Mass balance (%)                                              | 100 $\pm$ 1%          |                     | 94 $\pm$ 4%          |                      |       |
|                            | NTO <sub>total</sub> –NTO <sub>aq</sub> ( $\mu\text{mol/g}$ ) | 15 $\pm$ 2            |                     | 103 $\pm$ 8          |                      |       |
|                            | ATO <sub>total</sub> ( $\mu\text{mol/g}$ )                    | –                     |                     | 91 $\pm$ 6           |                      |       |
|                            |                                                               |                       | Rogue <sub>OX</sub> |                      | Rogue <sub>RED</sub> |       |
|                            | ( $\mu\text{mol/g}$ )                                         | average               | stdev               | average              | stdev                |       |
|                            | NTO <sub>total</sub>                                          | 138                   | 0                   | 138                  | 0                    |       |
|                            | NTO <sub>aq</sub>                                             | 94                    | 5                   | 26                   | 2                    |       |
|                            | ATO <sub>aq</sub>                                             | –                     | –                   | 73                   | 1                    |       |
|                            | NTO <sub>s</sub>                                              | 29                    | 2                   | 2                    | 0                    |       |
|                            | ATO <sub>s</sub>                                              | –                     | –                   | 21                   | 1                    |       |
|                            | Mass balance (%)                                              | 88 $\pm$ 5%           |                     | 89 $\pm$ 3%          |                      |       |
|                            | NTO <sub>total</sub> –NTO <sub>aq</sub> ( $\mu\text{mol/g}$ ) | 44 $\pm$ 6            |                     | 112 $\pm$ 2          |                      |       |
|                            | ATO <sub>total</sub> ( $\mu\text{mol/g}$ )                    | –                     |                     | 94 $\pm$ 2           |                      |       |
| Figures 6(c) and (d): DNAN |                                                               | Rogue <sub>OX</sub>   |                     | Rogue <sub>RED</sub> |                      |       |
|                            |                                                               | ( $\mu\text{mol/g}$ ) | average             | stdev                | average              | stdev |
|                            |                                                               | DNAN <sub>total</sub> | 911                 | 5                    | 911                  | 5     |
|                            |                                                               | DNAN <sub>aq</sub>    | 397                 | 11                   | 281                  | 30    |
|                            |                                                               | 2ANAN <sub>aq</sub>   | –                   | –                    | 24                   | 3     |
|                            |                                                               | 4ANAN <sub>aq</sub>   | –                   | –                    | 1                    | 0     |
|                            |                                                               | DNAN <sub>s</sub>     | 444                 | 15                   | 454                  | 30    |
|                            |                                                               | 2ANAN <sub>s</sub>    | –                   | –                    | 42                   | 11    |
|                            |                                                               | 4ANAN <sub>s</sub>    | –                   | –                    | 1                    | 1     |
|                            |                                                               | Mass balance (%)      | 92 $\pm$ 3%         |                      | 88 $\pm$ 9%          |       |

|                                                                              |                                                         |                     |       |                      |       |
|------------------------------------------------------------------------------|---------------------------------------------------------|---------------------|-------|----------------------|-------|
|                                                                              | DNAN <sub>total</sub> -DNAN <sub>aq</sub> (μmol/g)      | 518±5               |       | 630±20               |       |
|                                                                              | 2ANAN <sub>total</sub> +4ANAN <sub>total</sub> (μmol/g) | -                   |       | 67±7                 |       |
| Figures 6(e) and (f): RDX                                                    |                                                         | Rogue <sub>OX</sub> |       | Rogue <sub>RED</sub> |       |
|                                                                              | (μmol/g)                                                | average             | stdev | average              | stdev |
|                                                                              | RDX <sub>total</sub>                                    | 452                 | 20    | 434                  | 20    |
|                                                                              | RDX <sub>aq</sub>                                       | 220                 | 2     | 102                  | 6     |
|                                                                              | MNX <sub>aq</sub>                                       | -                   | -     | 2                    | 0     |
|                                                                              | NO <sub>2</sub> <sup>-</sup> <sub>aq</sub>              | -                   | -     | 9                    | 6     |
|                                                                              | RDX <sub>s</sub>                                        | 212                 | 11    | 162                  | 11    |
|                                                                              | MNX <sub>s</sub>                                        | -                   | -     | 3                    | 0     |
|                                                                              | Mass balance (%)                                        | 96±3%               |       | 64±4%                |       |
|                                                                              | RDX <sub>total</sub> -RDX <sub>aq</sub> (μmol/g)        | 232±20              |       | 332±19               |       |
| MNX <sub>total</sub> +NO <sub>2</sub> <sup>-</sup> <sub>total</sub> (μmol/g) | -                                                       |                     | 14±6  |                      |       |

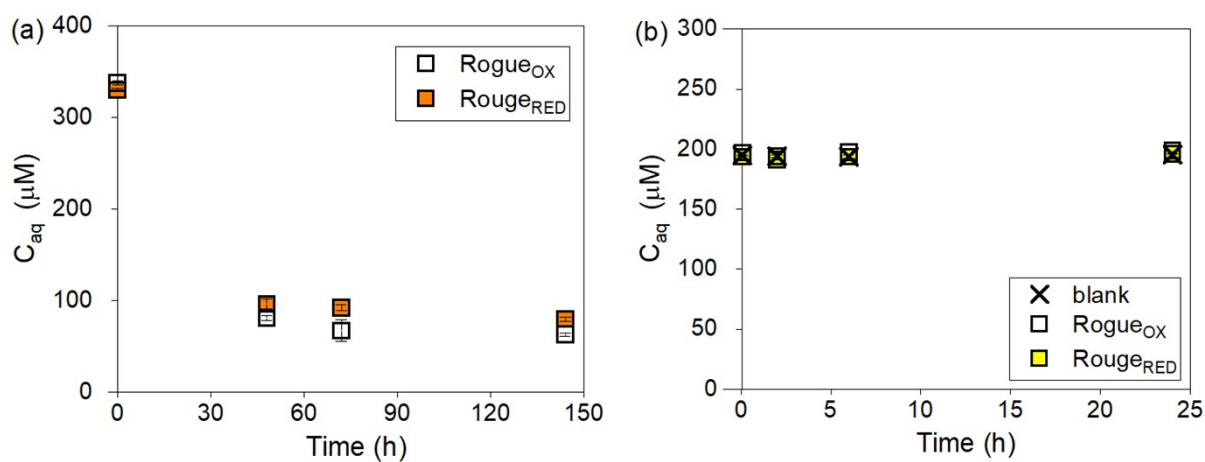

Figure S9. Aqueous concentration ( $C_{aq}$ ) of the daughter product of MC transformation over time with 0.44 g/L of Rogue in ASR at pH 6. (a) 2ANAN (b)  $NO_2^-$

Section S6.  $\text{NO}_2^-$  production from the abiotic transformation of RDX by  $\text{Rogue}_{\text{RED}}$ 

To verify the production of  $\text{NO}_2^-$  from the abiotic reduction of RDX by  $\text{Rogue}_{\text{RED}}$ , batch reactors containing 1 g of either  $\text{Rogue}_{\text{OX}}$  or  $\text{Rogue}_{\text{RED}}$  were prepared in duplicates. Each reactor contained 0.2 L of *ca.* 140  $\mu\text{M}$  RDX (corresponding to 28  $\mu\text{mol}$  of RDX). Solutions were buffered with 25 mM HEPES at pH 7 instead of ASR because the  $\text{Cl}^-$  in ASR interfered with ion chromatographic (IC) detection of  $\text{NO}_2^-$ . Due to the low solubility of RDX (270  $\mu\text{M}^7$ ), four additional aliquots of RDX stock solution (6 mL per aliquot, each containing 9.32  $\mu\text{mol}$  RDX) were added to the reactor at later times.  $\text{NO}_2^-$  was measured using a Metrohm 850 Professional IC.

As shown in Figure S10, in contrast to reactors containing  $\text{Rogue}_{\text{OX}}$  where no  $\text{NO}_2^-$  was detected, about 5.5  $\mu\text{mol}$  of  $\text{NO}_2^-$  was produced within 1 h. As more RDX was added in four additional doses, 6 and 7  $\mu\text{mol}$  of  $\text{NO}_2^-$  were formed after the first and second doses, respectively, while further  $\text{NO}_2^-$  formation was minimal following the third and fourth doses. The total amount of  $\text{NO}_2^-$  produced per gram of  $\text{Rogue}_{\text{RED}}$  was 22  $\mu\text{mol}$ , clearly indicating the ESC of  $\text{Rogue}$  was accessible to and reactive toward RDX.

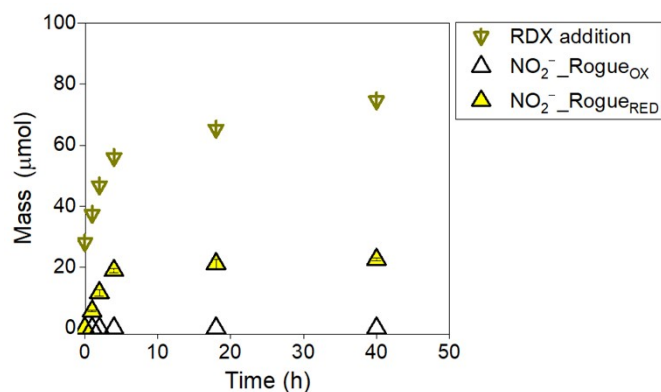

Figure S10.  $\text{NO}_2^-$  formation upon RDX addition to reactors containing 5 g/L of  $\text{Rogue}$ .

## References

1. D. Xin, N. Saha, M. T. Reza, J. Hudson and P. C. Chiu, Pyrolysis creates electron storage capacity of black carbon (biochar) from lignocellulosic biomass, *ACS Sustainable Chemistry & Engineering*, 2021 **9**, 6821-6831. 10.1021/acssuschemeng.1c01251
2. D. Xin, M. Xian and P. C. Chiu, New methods for assessing electron storage capacity and redox reversibility of biochar, *Chemosphere*, 2019, **215**, 827-834. 10.1016/j.chemosphere.2018.10.080
3. G. Gran, Determination of the equivalence point in potentiometric titrations. Part II, *Analyst*, 1952, **77**, 661-671. 10.1039/AN9527700661
4. J. Murillo-Gelvez, K. P. Hickey, D. M. Di Toro, H. E. Allen, R. F. Carbonaro and P. C. Chiu, Experimental validation of hydrogen atom transfer Gibbs free energy as a predictor of nitroaromatic reduction rate constants, *Environmental Science & Technology*, 2019, **53**, 5816-5827. 10.1021/acs.est.9b00910
5. W. M. Clark, Oxidation-reduction potentials of organic systems, 1960.
6. M. Aeschbacher, M. Sander and R. P. Schwarzenbach, Novel electrochemical approach to assess the redox properties of humic substances, *Environmental Science & Technology*, 2010, **44**, 87-93. 10.1021/es902627p
7. K. Dontsova, S. Taylor and R. Pesce-Rodriguez, *SERDP Project ER-2220: Dissolution of NTO, DNAN and insensitive munitions formulations and their fates in soils*, University of Arizona, Tuscon, United States, February 2018.
